# Supplementary material for: Spin relaxation: under the sun, anything new?
Source: Copernicus journal article supplement (doi:10.5194/mr-2021-62), 2021-09-23
Supplement: Supplementary file [file mr-2021-62-AC4-supplement.pdf]

*This paper certainly has generated already considerable discussion and I do not find much to add that has not already been said elegantly by other reviewers and commentators. It is often the case in science that alternative derivations of the same result provide new insights into the underlying physical principles, and I think that this paper, following on recent papers by Bengs and Levitt and Barbara, is a good example of the phenomenon. I found the discussion around the left and right spectral density functions and the interrelationship to Boltzmann factors to be particularly interesting and I suspect will be interesting to the many students of the subject who are, like this reviewer, more familiar with classical spectral density functions*

We wish to thank the reviewer for his comments and for finding interest in our work.
